# Supplementary material for: Molecular basis for substrate recognition and septum cleavage by AtlA, the major N-acetylglucosaminidase of Enterococcus faecalis
Source: PubMed Central journal article supplement (PMC9108991; doi:10.1016/j.jbc.2022.101915), 2022-04-07
Supplement: mmc1.pdf [file mmc1.pdf]

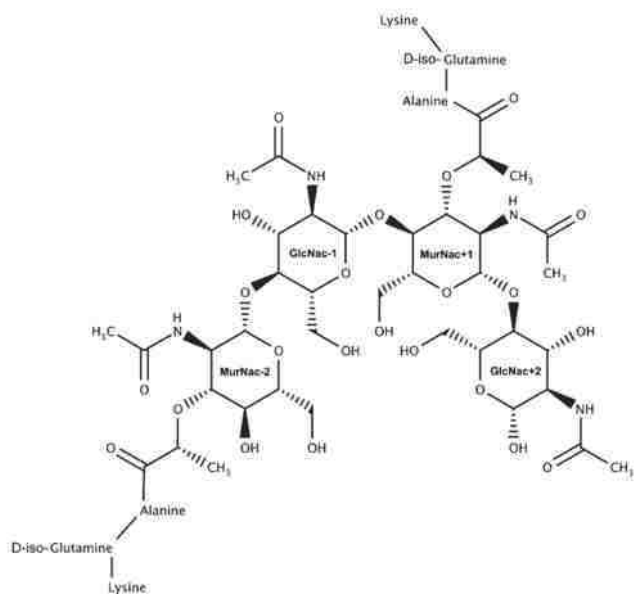

**Figure S1. 2D representation of the peptidoglycan substrate used in the docking experiment.** The molecule is a repetition of beta-1,4-linked *N*-acetylmuramic acid (MurNac) and *N*-acetylglucosamine (GlcNac) residues, with MurNac residues substituted by tripeptide stems made of L-Alanine, D-isoglutamine and L-Lysine.

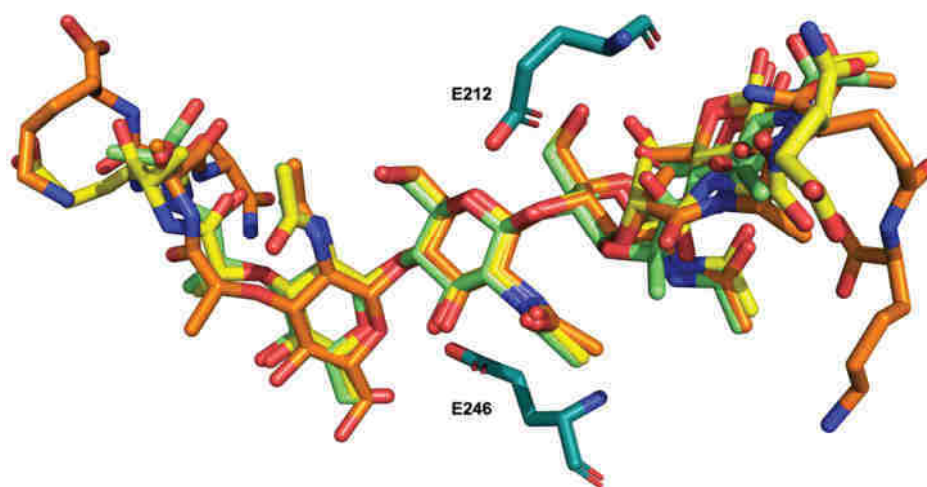

**Figure S2. Superposition of the docking poses for 3 peptidoglycan substrates with various peptide chain lengths.** A tripeptide (L-alanine, D-isoglutamine, L-lysine) is shown in orange sticks, a dipeptide (L-alanine, D-isoglutamine) in yellow sticks and a monopeptide (L-alanine) in green sticks. The two putative catalytic glutamates are shown as blue sticks.

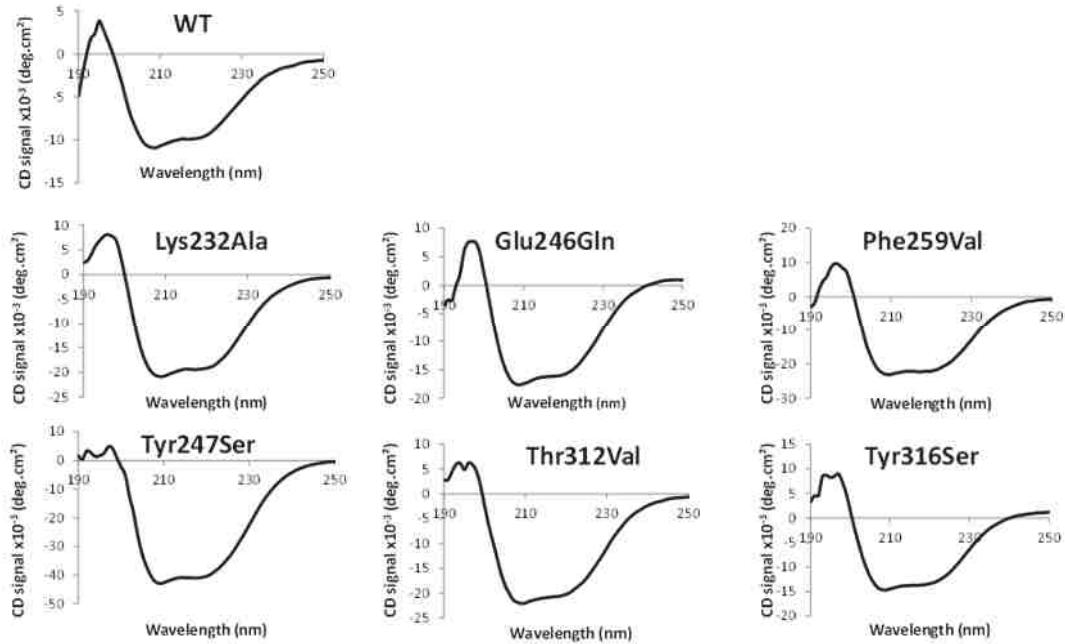

**Figure S3. Circular dichroism analysis of recombinant AtIA variants.** Each protein was resuspended at a concentration of 0.25 mg/ml and far-UV CD spectra were acquired with a Peltier thermally controlled cuvette holder at 25°C, from 190 to 350 nm.

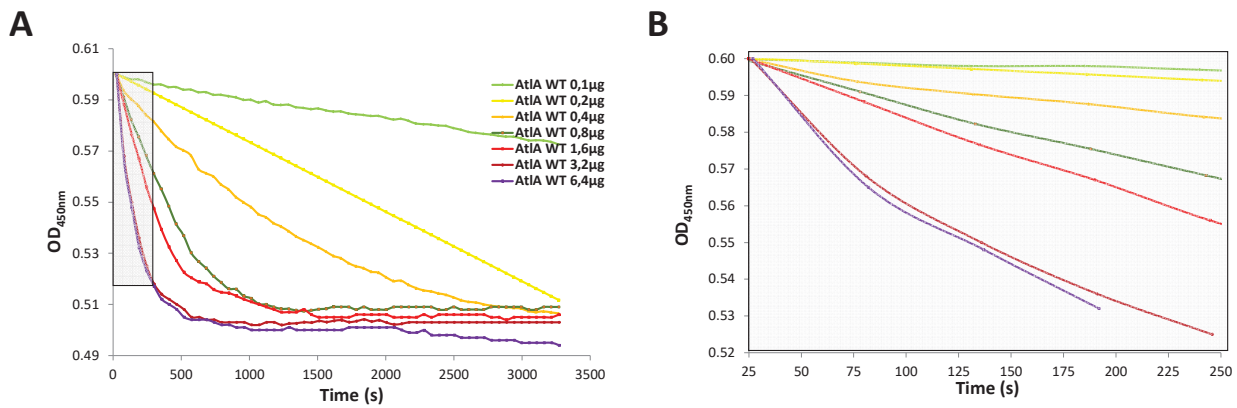

**Figure S4. Determination of AtIA specific activity.** **A**, *M. luteus* autoclaved cells were incubated at 37°C in the presence of various amounts of recombinant AtIA and the optical density at 450nm ( $OD_{450nm}$ ) was recorded over time. **B**, The specific activity (expressed in  $\Delta OD_{450nm}/h/mg$  of protein) was calculated from the linear portion of the curve.

**Table S1. Bacterial strains, plasmids and oligonucleotides.**

| Strains/plasmids/<br>oligonucleotides | Relevant properties                                                       | Source    |
|---------------------------------------|---------------------------------------------------------------------------|-----------|
| <b>Strains</b>                        |                                                                           |           |
| <i>Enterococcus faecalis</i><br>V583  | Sequenced strain (clinical isolate)                                       | (14)      |
| <i>Escherichia coli</i><br>BL21(DE3)  | Expression strain                                                         | NEB       |
| NEB5alpha                             | Cloning strain (pET derivatives)                                          | NEB       |
| TG1 ( <i>repA</i> <sup>+</sup> )      | Cloning strain (pGhost derivatives)                                       | Lab stock |
| <i>Micrococcus lysodeikticus</i>      | Substrate for zymograms                                                   | ATCC4698  |
| <b>Plasmids</b>                       |                                                                           |           |
| pET2818                               | pET28/16 variant for C-terminal Histidine-tag fusion                      | Lab stock |
| pGhost9                               | Thermosensitive plasmid (ErmR) <sup>a</sup> for allele replacement        | (16)      |
| pML420                                | pET2818 derivative expressing AtIA catalytic domain (residues 172 to 336) | This work |
| pML118                                | pET2818 derivative expressing full length AtIA (residues 54 to 737)       | (8)       |
| pMLE2120                              | pML118 derivative with the D313N mutation                                 | This work |
| pMLK232A                              | pML118 derivative with the K232A mutation                                 | This work |
| pMLE246Q                              | pML118 derivative with the D313N mutation                                 | This work |
| pMLF259V                              | pML118 derivative with the F259V mutation                                 | This work |
| pMLT312V                              | pML118 derivative with the T312V mutation                                 | This work |
| pMLY316S                              | pML118 derivative with the D313N mutation                                 | This work |
| pGE212Q                               | pGhost9 derivative to build mutant E212Q                                  | (4)       |
| pGK232A                               | pGhost9 derivative to build mutant K232A                                  | This work |
| pGE246Q                               | pGhost9 derivative to build mutant E246Q                                  | This work |
| pGF259V                               | pGhost9 derivative to build mutant F259V                                  | This work |
| pGT312V                               | pGhost9 derivative to build mutant T312V                                  | This work |
| pGY316S                               | pGhost9 derivative to build mutant Y316S                                  | This work |
| <b>Oligonucleotides</b>               |                                                                           |           |
| AtIA cat F                            | ATACCATGGGGTCAGCGTTATCACCGACGC                                            |           |
| AtIA cat R                            | ATGGGATCCAGAAGATGGTGTATCATATTGAGTTAAG                                     |           |
| AtIA pG F                             | AAAGAATTCACAGAAGAGCAGCCAACAAATGC                                          |           |
| AtIA pG R                             | ATTCTCGAGACCAACTTTTAAAGTTTGACCAATATAAAATTG                                |           |
| E212Q F                               | GATGATGGCTCAAGCAATCGTTCAAAGTGGTTGGGGAGCAAGTA                              |           |
| E212Q R                               | CGTACTTGCTCCCCAACCACCTTTGAACGATTGCTTGAGCCATCAT                            |           |
| K232A F                               | CTTATTTGGGATTGCAGGCAGCTACAATGGACAATCTGTC                                  |           |
| K232A R                               | TTGTAGCTGCCTGCAATCCCAAATAAGTTATAGTTTGGTG                                  |           |
| E246Q F                               | CTATATGGATACATGGCAATATTTAAACGGCAAATGGTTAGTG                               |           |
| E246Q R                               | TTGCCGTTTAAATATTGCCATGTATCCATATAGACAGATTGTC                               |           |
| F259V F                               | GAAAAAAGAACCTGTCCGTAATATCCTTCTTACATGGA                                    |           |
| F259V R                               | GATATTTACGGACAGGTTCTTTTTTCACTAACCATTT                                     |           |
| T312V F                               | GGTCGTTATGCGGTAGATCCTAGCTACAATGCTAAATTA                                   |           |
| T312V R                               | GTAGCTAGGATCTACCGCATAACGACCTGTTAACCAAGCA                                  |           |
| Y316S F                               | CAGATCCTAGCTCCAATGCTAAATTAATAATGTCATT                                     |           |
| Y316S R                               | AATTTAGCATTGGAGCTAGGATCTGTCGCATAACGACC                                    |           |

<sup>a</sup> ErmR, resistance to erythromycin
